# Supplementary material
Source: PubMed Central journal article supplement (PMC3561735)
Supplement: NIHMS268272-supplement-01.pdf [file NIHMS268272-supplement-01.pdf]

|                                                                                                                                                                                                                                                                                                                                                                                                                                                                                                                                                                                                                                                                                                                                                                                                                                                                                                                                                                                                                                                                                                                                                                                                                                                                                                                                                                                                                                                                                                                                                                                                                                                                                                                                                |                                                                                                                                                                                                                                                                                                                                                                                                                                                                                                                                                                                                                                                                                                                                                                                                                                                                                                                                                                                                                                                                                                                                                                                                                                                                                                                                                                                                                                                                                                                                        |
|------------------------------------------------------------------------------------------------------------------------------------------------------------------------------------------------------------------------------------------------------------------------------------------------------------------------------------------------------------------------------------------------------------------------------------------------------------------------------------------------------------------------------------------------------------------------------------------------------------------------------------------------------------------------------------------------------------------------------------------------------------------------------------------------------------------------------------------------------------------------------------------------------------------------------------------------------------------------------------------------------------------------------------------------------------------------------------------------------------------------------------------------------------------------------------------------------------------------------------------------------------------------------------------------------------------------------------------------------------------------------------------------------------------------------------------------------------------------------------------------------------------------------------------------------------------------------------------------------------------------------------------------------------------------------------------------------------------------------------------------|----------------------------------------------------------------------------------------------------------------------------------------------------------------------------------------------------------------------------------------------------------------------------------------------------------------------------------------------------------------------------------------------------------------------------------------------------------------------------------------------------------------------------------------------------------------------------------------------------------------------------------------------------------------------------------------------------------------------------------------------------------------------------------------------------------------------------------------------------------------------------------------------------------------------------------------------------------------------------------------------------------------------------------------------------------------------------------------------------------------------------------------------------------------------------------------------------------------------------------------------------------------------------------------------------------------------------------------------------------------------------------------------------------------------------------------------------------------------------------------------------------------------------------------|
| <p><b>1000 Bioinformatics</b></p> <ul style="list-style-type: none"> <li>1001 Bioinformatics Fundamentals</li> <li>1002 Biological Databases</li> <li>1003 Cheminformatics</li> <li>1004 DNA Analysis</li> <li>1005 Expression Patterns</li> <li>1006 Finding Genes</li> <li>1007 Finding Similarities and Inferring Homologies</li> <li>1008 Modeling Structures from Sequence</li> <li>1009 Molecular Modeling</li> <li>1010 Phylogenetic Trees</li> <li>1011 Protein Analysis</li> <li>1012 Proteomics</li> <li>1013 Recognizing Functional Domains</li> <li>1014 RNA Analysis</li> </ul> <p><b>1200 Cell Biology</b></p> <ul style="list-style-type: none"> <li>1201 Adhesion</li> <li>1202 Analysis of Proteins</li> <li>1203 Antibodies as Tools</li> <li>1204 Apoptosis</li> <li>1205 Cancer</li> <li>1206 Cell Cycle Analysis</li> <li>1207 Cell Isolation and Culture</li> <li>1208 Cell and Organelle Motility</li> <li>1209 Enzyme Assays</li> <li>1210 Extracellular Matrix</li> <li>1211 Fluorescent Proteins as Probes of Structure and Function</li> <li>1212 Histology</li> <li>1213 In Vitro Reconstitution</li> <li>1214 Labeling Molecules</li> <li>1215 Lipids and Fatty Acids</li> <li>1216 Manipulating Gene Expression</li> <li>1217 Microscopy and Imaging</li> <li>1218 Molecular Biology Techniques</li> <li>1219 Molecular Interactions</li> <li>1220 Molecular Trafficking</li> <li>1221 Nanotechnology</li> <li>1222 Nuclei and Chromosomes</li> <li>1223 Organelle Analysis</li> <li>1224 Plant Biology</li> <li>1225 Signal Transduction</li> <li>1226 Stem Cells and Differentiation</li> <li>1227 Subcellular Fractionation</li> <li>1228 Viruses</li> <li>1229 Whole Organism and Tissue Analysis</li> </ul> | <p><b>1400 Cell Culture</b></p> <ul style="list-style-type: none"> <li>1401 Bacteria</li> <li>1402 Mammalian</li> <li>1403 Invertebrates</li> <li>1404 Plants</li> <li>1405 Viruses</li> <li>1406 Yeasts and Fungi</li> </ul> <p><b>1600 Chemical Biology</b></p> <ul style="list-style-type: none"> <li>1601 Protein Modification and Labeling</li> <li>1602 Enzyme Engineering</li> <li>1603 High&amp;hyphen;Content Assay Design</li> <li>1604 High&amp;hyphen;Throughput Assay Design</li> <li>1605 Target Identification for Small Molecules</li> </ul> <p><b>1800 Cytometry</b></p> <ul style="list-style-type: none"> <li>1801 Flow Cytometry</li> <li>1802 Imaging</li> <li>1803 Instrumentation</li> <li>1804 Probes</li> <li>1805 Quality Control and Safety</li> <li>1806 Microbiology</li> </ul> <p><b>2000 Gene Expression</b></p> <ul style="list-style-type: none"> <li>2001 Detection in Cells and Tissues</li> <li>2002 Differential Expression</li> <li>2003 Gene Silencing/RNAi</li> <li>2004 Microarrays and Data Analysis</li> <li>2005 Transcription and Translation</li> </ul> <p><b>2400 Imaging and Microscopy</b></p> <ul style="list-style-type: none"> <li>2401 Confocal Microscopy</li> <li>2402 Electron Microscopy</li> <li>2403 Fluorescence Microscopy</li> <li>2404 Image Analysis</li> <li>2405 Image Manipulation</li> <li>2406 Instrumentation</li> <li>2407 Light Microscopy</li> <li>2408 Magnetic Resonance Imaging</li> <li>2409 Other Techniques</li> <li>2410 Sample Preparation</li> </ul> |
|------------------------------------------------------------------------------------------------------------------------------------------------------------------------------------------------------------------------------------------------------------------------------------------------------------------------------------------------------------------------------------------------------------------------------------------------------------------------------------------------------------------------------------------------------------------------------------------------------------------------------------------------------------------------------------------------------------------------------------------------------------------------------------------------------------------------------------------------------------------------------------------------------------------------------------------------------------------------------------------------------------------------------------------------------------------------------------------------------------------------------------------------------------------------------------------------------------------------------------------------------------------------------------------------------------------------------------------------------------------------------------------------------------------------------------------------------------------------------------------------------------------------------------------------------------------------------------------------------------------------------------------------------------------------------------------------------------------------------------------------|----------------------------------------------------------------------------------------------------------------------------------------------------------------------------------------------------------------------------------------------------------------------------------------------------------------------------------------------------------------------------------------------------------------------------------------------------------------------------------------------------------------------------------------------------------------------------------------------------------------------------------------------------------------------------------------------------------------------------------------------------------------------------------------------------------------------------------------------------------------------------------------------------------------------------------------------------------------------------------------------------------------------------------------------------------------------------------------------------------------------------------------------------------------------------------------------------------------------------------------------------------------------------------------------------------------------------------------------------------------------------------------------------------------------------------------------------------------------------------------------------------------------------------------|

|                                                                                                                                                                                                                                                                                                                                                                                                                                                                                                                                                                                                                                                                                                                                                                                                                    |                                                                                                                                                                                                                                                                                                                                                                                                                                                                                                                                                                                                                                                                                                                                                                                                                                                                                                                                                                                                                                                                                                                                                                                                                                                                                                                        |
|--------------------------------------------------------------------------------------------------------------------------------------------------------------------------------------------------------------------------------------------------------------------------------------------------------------------------------------------------------------------------------------------------------------------------------------------------------------------------------------------------------------------------------------------------------------------------------------------------------------------------------------------------------------------------------------------------------------------------------------------------------------------------------------------------------------------|------------------------------------------------------------------------------------------------------------------------------------------------------------------------------------------------------------------------------------------------------------------------------------------------------------------------------------------------------------------------------------------------------------------------------------------------------------------------------------------------------------------------------------------------------------------------------------------------------------------------------------------------------------------------------------------------------------------------------------------------------------------------------------------------------------------------------------------------------------------------------------------------------------------------------------------------------------------------------------------------------------------------------------------------------------------------------------------------------------------------------------------------------------------------------------------------------------------------------------------------------------------------------------------------------------------------|
| <p><b>2200 Genetics and Genomics</b></p> <ul style="list-style-type: none"> <li>2201 Biochemical Genetics</li> <li>2202 Cancer Genetics</li> <li>2203 Clinical Molecular Genetics</li> <li>2204 Cytogenetics</li> <li>2205 Detecting Mutations and Variants</li> <li>2206 Disease Models</li> <li>2207 Expression Profiling</li> <li>2208 Forensic Genetics</li> <li>2209 Gene Therapy</li> <li>2210 Genetic Association Studies</li> <li>2211 Genetic Linkage Analysis</li> <li>2212 Genome Structure Analysis</li> <li>2213 Genotyping</li> <li>2214 High-throughput Sequencing</li> <li>2215 Karyotyping and Idiograms</li> <li>X2216 Microbial</li> <li>2217 Mining the Human Genome Sequence</li> <li>2218 Model Systems</li> <li>2219 Somatic Cell Hybrids</li> <li>2220 Vectors and Gene Therapy</li> </ul> | <p><b>2600 Immunology</b></p> <ul style="list-style-type: none"> <li>2601 Adjuvants</li> <li>2602 Animal Models</li> <li>2603 Antibodies</li> <li>2604 Antigen Presentation</li> <li>2605 Antigen Processing</li> <li>2606 Antigens</li> <li>2607 Autoimmunity</li> <li>2608 Cell Activation</li> <li>2609 Complement</li> <li>2610 Cytokines</li> <li>2611 Detection and Analysis of HIV</li> <li>2612 Engineering Immune Molecules and Receptors</li> <li>2613 Flow Cytometry</li> <li>2614 Host-pathogen Interactions</li> <li>2615 Immune Cell Function</li> <li>2616 Immune Disease</li> <li>2617 Immunization</li> <li>2618 Immunofluorescence and Cell Sorting</li> <li>2619 Immunologic Study in Humans</li> <li>2620 In Vivo Assays for Lymphocyte Function</li> <li>2621 Induction of Immune Responses</li> <li>2622 Inflammatory Disease Models</li> <li>2623 Innate Immunity</li> <li>2624 Ligand-receptor Interactions</li> <li>2625 Major Histocompatibility Complex</li> <li>2626 Regulation of Immune Responses</li> <li>2627 Stem and Progenitor Cells</li> <li>2628 Toll-like Receptors</li> <li>2629 Tumor Immunology</li> <li>2630 In Vitro Assays for Immune Cell Function</li> <li>2631 In Vivo Assays for Immune Cell Function</li> <li>2632 In Vitro Assays for Lymphocyte Function</li> </ul> |
| <p><b>2800 Intermolecular Interactions</b></p> <ul style="list-style-type: none"> <li>2801 Catalysis</li> <li>2802 DNA-protein Interactions</li> <li>2803 FRET</li> <li>2804 Nucleic Acid Conjugates</li> <li>2805 Protein Interactions</li> <li>2806 Protein Labeling and Modification</li> <li>2807 RNA-protein Interactions</li> <li>2808 Small Molecule Screening and Analysis</li> </ul>                                                                                                                                                                                                                                                                                                                                                                                                                      |                                                                                                                                                                                                                                                                                                                                                                                                                                                                                                                                                                                                                                                                                                                                                                                                                                                                                                                                                                                                                                                                                                                                                                                                                                                                                                                        |
| <p><b>3200 Magnetic Resonance Imaging</b></p> <ul style="list-style-type: none"> <li>3201 Abdominal and Pelvic</li> <li>3202 Brain</li> <li>3203 Cerebral Neoplastic Disease</li> <li>3204 Chest</li> <li>3205 Clinical Functional Magnetic Resonance Imaging (fMRI)</li> <li>3206 Head and Neck</li> <li>3207 Heart Disease</li> <li>3208 Intracranial Arterial Disease</li> <li>3209 Musculoskeletal</li> <li>3210 Spine</li> <li>3211 Theory and Basic Concepts</li> </ul>                                                                                                                                                                                                                                                                                                                                      | <p><b>3800 Neuroscience</b></p> <ul style="list-style-type: none"> <li>3801 Surgical Procedures</li> <li>3802 Molecular Neurobiology</li> <li>3803 Behavioral Neuroscience</li> <li>3804 Cellular and Developmental Neuroscience</li> <li>3805 Imaging</li> <li>3806 Neuroanatomical Methods</li> <li>3807 Neurochemistry</li> <li>3808 Neurophysiology and Electrophysiology</li> <li>3809 Preclinical Models of Neurologic and Psychiatric Disease</li> <li>3810 Neural Cell and Tissue Culture</li> </ul>                                                                                                                                                                                                                                                                                                                                                                                                                                                                                                                                                                                                                                                                                                                                                                                                           |

|                                                                                                                                                                                                                                                                                                                                                                                                                                                                                                                                                                                                                                                                                                                                                                                                                                                                                                                                                                                                                                                                                                                                                                                              |                                                                                                                                                                                                                                                                                                                                                                                                                                                                                                                                                                                                                                                                                                                                                                                                             |
|----------------------------------------------------------------------------------------------------------------------------------------------------------------------------------------------------------------------------------------------------------------------------------------------------------------------------------------------------------------------------------------------------------------------------------------------------------------------------------------------------------------------------------------------------------------------------------------------------------------------------------------------------------------------------------------------------------------------------------------------------------------------------------------------------------------------------------------------------------------------------------------------------------------------------------------------------------------------------------------------------------------------------------------------------------------------------------------------------------------------------------------------------------------------------------------------|-------------------------------------------------------------------------------------------------------------------------------------------------------------------------------------------------------------------------------------------------------------------------------------------------------------------------------------------------------------------------------------------------------------------------------------------------------------------------------------------------------------------------------------------------------------------------------------------------------------------------------------------------------------------------------------------------------------------------------------------------------------------------------------------------------------|
| <p><b>3400 Microbiology</b></p> <ul style="list-style-type: none"> <li>3401 Anti&amp;hyphen;Infectives</li> <li>3402 DNA Viruses</li> <li>3403 Gram Negatives</li> <li>3404 Gram Positives</li> <li>3405 Host Organisms and Tissue Cultures</li> <li>3406 Microbial Communities</li> <li>X3407 Microbial Genetics</li> <li>3408 RNA Viruses</li> <li>X3409 Spirochetes, Chlamydiae, and Other Eubacteria</li> <li>3410 Environmental Microbiology</li> </ul>                                                                                                                                                                                                                                                                                                                                                                                                                                                                                                                                                                                                                                                                                                                                 | <p><b>4000 Nucleic Acid Chemistry</b></p> <ul style="list-style-type: none"> <li>4001 Combinatorial Methods</li> <li>4002 Cross&amp;hyphen;Linking Nucleic Acids</li> <li>4003 Nanotechnology</li> <li>4004 Nucleic Acid Arrays</li> <li>4005 Nucleic Acid Structure and Folding</li> <li>4006 Nucleic Acid&amp;hyphen;Binding Molecules</li> <li>4007 Nucleosides and Nucleotides</li> <li>4008 Oligonucleotides</li> <li>4009 Protection Strategies</li> <li>4010 Therapeutic Compounds and Approaches</li> </ul>                                                                                                                                                                                                                                                                                         |
| <p><b>3600 Molecular Biology</b></p> <ul style="list-style-type: none"> <li>3601 Carbohydrate Analysis</li> <li>3602 Chromatin Assembly and Analysis</li> <li>3603 Cloning and Recombination Methods</li> <li>3604 Combinatorial Methods</li> <li>3605 DNA&amp;hyphen;Protein Interactions</li> <li>3606 &lt;i&gt;E. coli&lt;/i&gt;, Plasmids, and Bacteriophages</li> <li>3607 Enzymatic Manipulation of DNA and RNA</li> <li>3608 Expression Analysis</li> <li>3609 Gene Expression</li> <li>3610 Gene Regulation</li> <li>3611 Gene Silencing</li> <li>3612 Informatics</li> <li>3613 Introduction of DNA into Cells</li> <li>3614 Labeling Methods</li> <li>3615 Libraries</li> <li>3616 Molecular Interactions</li> <li>3617 Mouse Methods</li> <li>3618 Mutagenesis</li> <li>3619 Nucleic Acid Arrays</li> <li>3620 Polymerase Chain Reaction</li> <li>3621 Post&amp;hyphen;Translational Modification</li> <li>3622 Preparation and Analysis of DNA and RNA</li> <li>3623 Protein Analysis</li> <li>3624 Protein Expression</li> <li>3625 Recombinant DNA Libraries</li> <li>3626 RNA&amp;hyphen;Protein Interactions</li> <li>3627 Sequencing</li> <li>3628 Yeast Methods</li> </ul> | <p><b>4200 Pharmacology and Drug Discovery</b></p> <ul style="list-style-type: none"> <li>4201 Anti&amp;hyphen;Infectives</li> <li>4202 Anti&amp;hyphen;Inflammatory Agents</li> <li>4203 Cancer Pharmacology</li> <li>4204 Cardiovascular Pharmacology</li> <li>4205 Cellular and Molecular Pharmacology</li> <li>4206 Drug Discovery Technologies</li> <li>4207 Enzyme Assays</li> <li>4208 Gastrointestinal, Pulmonary, and Genito&amp;hyphen;Urinary Pharmacology</li> <li>4209 Isolated Tissues</li> <li>4210 Metabolic Disorders</li> <li>4211 Neuropharmacology</li> <li>4212 Organic Synthesis and Design</li> <li>4213 Pain</li> <li>4214 Pharmacokinetics/ADME</li> <li>4215 Preclinical Models of Disease</li> <li>4216 Receptor Binding</li> <li>4217 Safety Pharmacology/Toxicology</li> </ul> |
|                                                                                                                                                                                                                                                                                                                                                                                                                                                                                                                                                                                                                                                                                                                                                                                                                                                                                                                                                                                                                                                                                                                                                                                              | <p><b>5000 Safety</b></p> <ul style="list-style-type: none"> <li>5001 Biohazards</li> <li>5002 Chemical Hazards</li> <li>5003 Radiation</li> </ul>                                                                                                                                                                                                                                                                                                                                                                                                                                                                                                                                                                                                                                                          |
|                                                                                                                                                                                                                                                                                                                                                                                                                                                                                                                                                                                                                                                                                                                                                                                                                                                                                                                                                                                                                                                                                                                                                                                              | <p><b>5200 Stem Cells</b></p> <ul style="list-style-type: none"> <li>5201 Cancer Stem Cells</li> <li>5202 Characterization</li> <li>5203 Culture</li> <li>5204 Differentiation</li> <li>5205 Ectoderm</li> <li>5206 Embryonic Stem Cells</li> <li>5207 Endoderm</li> <li>5208 Extraembryonic</li> <li>5209 Genetic Manipulation</li> <li>5210 Germline</li> <li>5211 Hematopoiesis</li> <li>5212 Isolation</li> <li>5213 Manipulaton of Potency</li> <li>5214 Mesoderm</li> <li>5215 Somatic Stem Cells</li> </ul>                                                                                                                                                                                                                                                                                          |

|                                                                                                                                                                                                                                                                                                                                                                                                                                                                                                                                                                                                                                                                                                                       |                                                                                                                                                                                                                                                                                                                                      |
|-----------------------------------------------------------------------------------------------------------------------------------------------------------------------------------------------------------------------------------------------------------------------------------------------------------------------------------------------------------------------------------------------------------------------------------------------------------------------------------------------------------------------------------------------------------------------------------------------------------------------------------------------------------------------------------------------------------------------|--------------------------------------------------------------------------------------------------------------------------------------------------------------------------------------------------------------------------------------------------------------------------------------------------------------------------------------|
| <p><b>4400 Protein Production, Purification, and Analysis</b></p> <ul style="list-style-type: none"> <li>4401 Affinity Purification</li> <li>4402 Conventional Chromatography</li> <li>4403 Detection and Assay Methods</li> <li>4404 Electrophoresis</li> <li>4405 Extraction, Stabilization, and Concentration</li> <li>4406 Peptidases and Proteases</li> <li>4407 Peptides</li> <li>4408 Production of Recombinant Proteins</li> <li>4409 Protein Engineering</li> <li>4410 Purification of Recombinant Proteins</li> </ul>                                                                                                                                                                                       | <p><b>5400 Structural Analysis of Biomolecules</b></p> <ul style="list-style-type: none"> <li>5401 Experimental Determination of Structure</li> <li>5402 Folding and Conformational Change</li> <li>5403 Modeling Structure and Biomolecular Engineering</li> <li>5404 Molecular Probes of Structure</li> </ul>                      |
| <p><b>4600 Proteomics</b></p> <ul style="list-style-type: none"> <li>4601 Mass Spectrometry</li> <li>4602 Proteomic Data Processing and Analysis</li> <li>4603 Proteomic Methods</li> </ul>                                                                                                                                                                                                                                                                                                                                                                                                                                                                                                                           | <p><b>5600 Supporting Laboratory Techniques</b></p> <ul style="list-style-type: none"> <li>5601 Basic Laboratory Instruments</li> <li>5602 Basic Measurement Techniques</li> <li>5603 Presenting Data</li> <li>5604 Reagent Preparation</li> <li>5605 Safety</li> <li>5606 Separation Techniques</li> <li>5607 Statistics</li> </ul> |
| <p><b>4800 RNA</b></p> <ul style="list-style-type: none"> <li>4801 Chemical Biology of RNA</li> <li>4802 Informatics</li> <li>4803 Microarrays</li> <li>4804 Non-coding and Regulatory RNAs</li> <li>4805 Preparation and Analysis</li> <li>4806 Ribonucleic Proteins: Structure, Function, and Biosynthesis</li> <li>4807 RNA Interference</li> <li>4808 RNA-Protein Interactions</li> <li>4809 RNAs in Diseases</li> <li>4810 Small RNAs</li> <li>4811 Splicing Mechanisms and Regulation</li> <li>4812 Structure and Folding</li> <li>4813 Synthesis and Modification</li> <li>4814 Therapeutics</li> <li>4815 Translation Regulation</li> <li>4816 Transport and Localization</li> <li>4817 Viral RNAs</li> </ul> |                                                                                                                                                                                                                                                                                                                                      |

**5800 Toxicology**

- 5801 Animal Models
- 5802 Assessment of Cell Toxicity
- 5803 Behavioral Toxicology
- 5804 Biotransformation
- 5805 Cell Culture
- 5806 Developmental Toxicology
- 5807 DNA and RNA Analysis
- 5808 Genetic Toxicology
- 5809 Glutathione
- 5810 Hepatotoxicology
- 5811 Immunotoxicology
- 5812 In Vitro Models
- 5813 Metabolic Pathways
- 5814 Neurotoxicology
- 5815 Oxidative Stress
- 5816 Protein Analysis
- 5817 Regulatory Testing
- 5818 Reproductive Toxicology
- 5819 Safety
- 5820 Skin
- 5821 Stem Cells
- 5822 Teratology
- 5823 Toxicokinetics
